# Supplementary material for: Notch Pathway Activation Contributes to Inhibition of C2C12 Myoblast Differentiation by Ethanol
Source: PubMed Central journal article supplement (PMC3748126; doi:10.1371/journal.pone.0071632), 2013-08-20

# Supplemental Figure S1

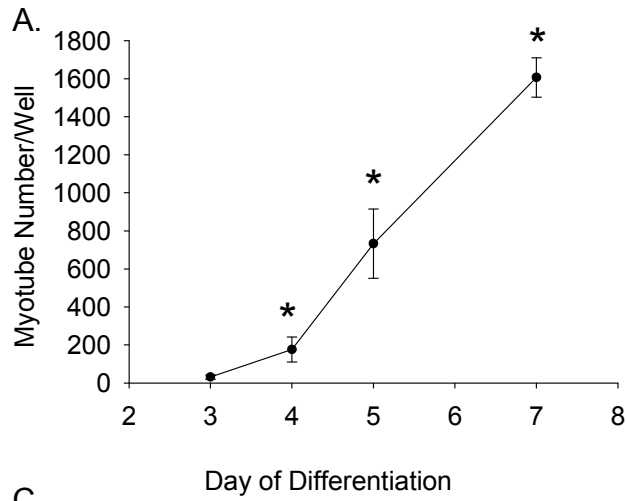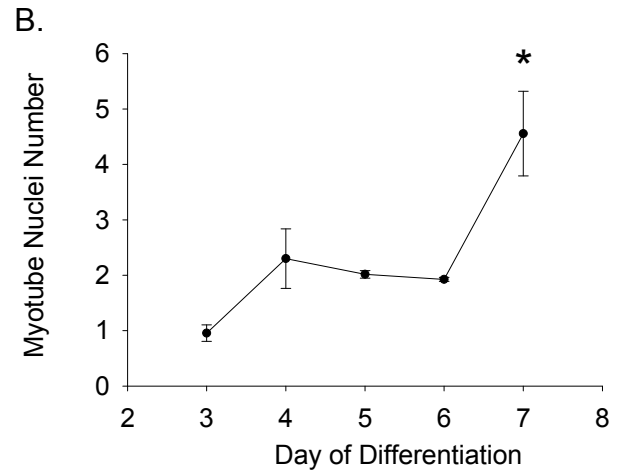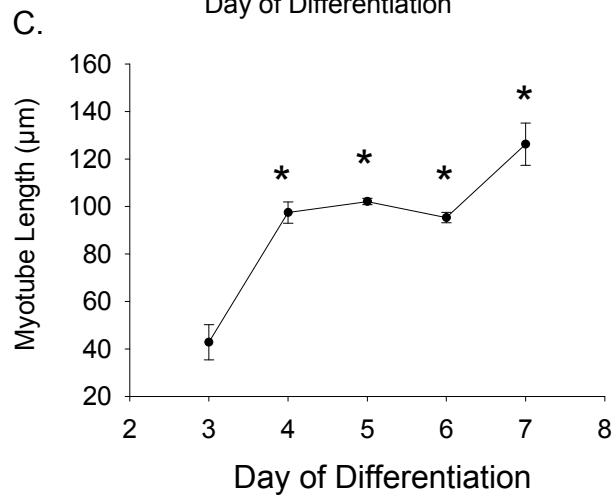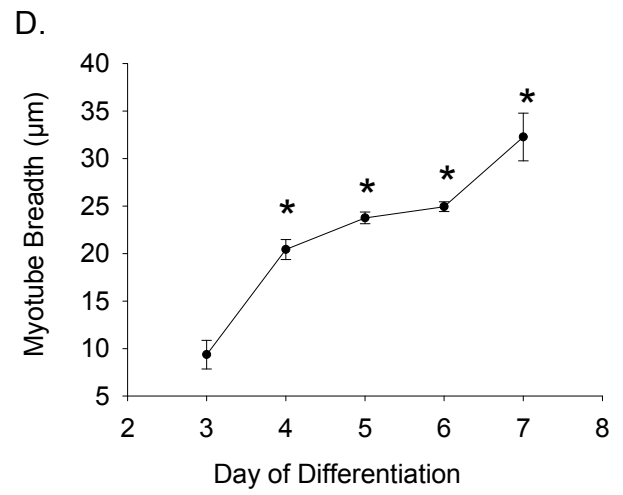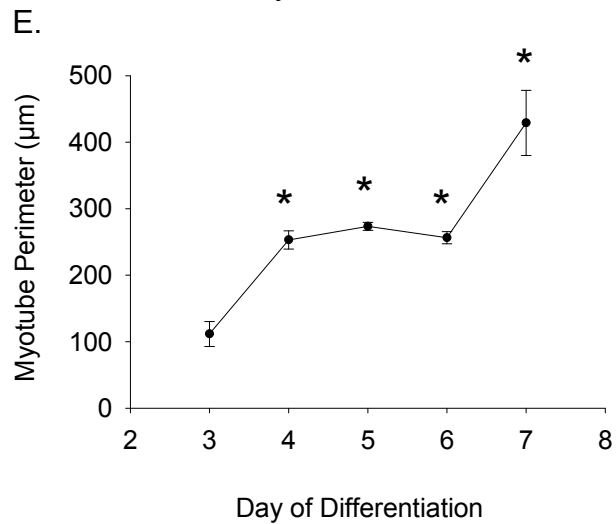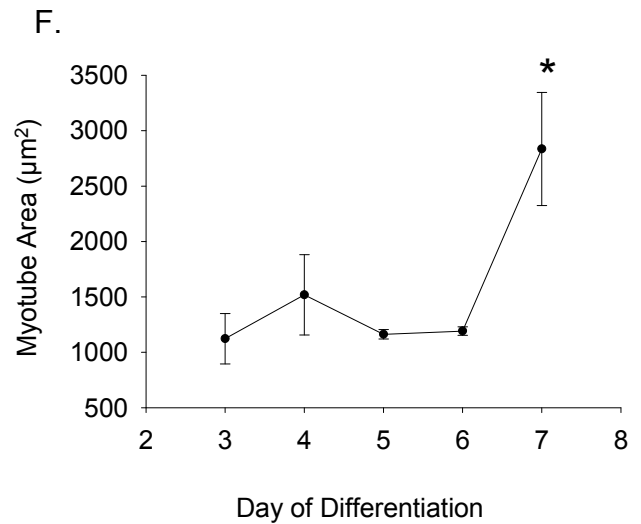

Supplement: pone.0071632.s001.pdf [file pone.0071632.s001.pdf]
